# Supplementary material for: Patterns of Health Care Use 5 Years After an Intervention Linking Patients in Addiction Treatment With a Primary Care Practitioner
Source: PubMed Central journal article supplement (PMC9650610; doi:10.1001/jamanetworkopen.2022.41338), 2022-11-10
Supplement: jamanetwopen-e2241338-s002.pdf [file jamanetwopen-e2241338-s002.pdf]

## Supplemental Online Content

Iturralde E, Weisner CM, Adams SR, et al. Patterns of health care use 5 years after an intervention linking patients in addiction treatment with a primary care practitioner. *JAMA Netw Open*. 2022;5(11):e2241338. doi:10.1001/jamanetworkopen.2022.41338

**eFigure 1.** Most Common Participant Emergency Department Diagnoses Coded as Emergent, Nonemergent, and Substance Use-Related

**eFigure 2.** Estimated Percentage of Participants by Group With Health Care System Engagement per Year of Study Follow-up

**eTable 1.** Health System Engagement Associated With Study Group Using Multiply Imputed Data

**eTable 2.** Health System Engagement Associated With Study Group, Complete Cases, No Deaths

**eTable 3.** Five-Year Health Care Use by Study Groups, Multiply Imputed Data

**eTable 4.** Five-Year Health Care Use by Study Group, Complete Cases, No Deaths

This supplemental material has been provided by the authors to give readers additional information about their work.

**eFigure 1. Most Common Participant Emergency Department Diagnoses Coded as Emergent, Nonemergent, and Substance Use-Related**

| Classification        | Primary Emergency Department Diagnosis                                                                                                                                                                                                                                                                                                                                                                                                                                                                        |                                                                                                                                                                                                                                                                                                                                                                                                                     |
|-----------------------|---------------------------------------------------------------------------------------------------------------------------------------------------------------------------------------------------------------------------------------------------------------------------------------------------------------------------------------------------------------------------------------------------------------------------------------------------------------------------------------------------------------|---------------------------------------------------------------------------------------------------------------------------------------------------------------------------------------------------------------------------------------------------------------------------------------------------------------------------------------------------------------------------------------------------------------------|
| Emergent              | Chest pain, unspecified<br>Abdominal pain, unspecified site<br>Other chest pain<br>Syncope and collapse<br>Unspecified septicemia<br>Abdominal pain, other specified site<br>Headache<br>Issue of repeat prescriptions<br>Other malaise and fatigue<br>Lumbago<br>Nausea with vomiting<br>Painful respiration<br>Urinary tract infection, site not specified                                                                                                                                                  | Dizziness and giddiness<br>Diarrhea<br>Other convulsions<br>Unspecified abdominal pain<br>Unspecified gastritis and gastroduodenitis, without mention of hemorrhage<br>Diabetes mellitus without mention of complication, type II or unspecified type, not stated as uncontrolled<br>Epigastric pain                                                                                                                |
| Non-emergent          | Headache<br>Issue of repeat prescriptions<br>Other malaise and fatigue<br>Lumbago<br>Nausea with vomiting<br>Urinary tract infection, site not specified<br>Dizziness and giddiness<br>Diarrhea<br>Diabetes mellitus without mention of complication, type II or unspecified type, not stated as uncontrolled<br>Calculus of gallbladder without mention of cholecystitis, without mention of obstruction<br>Pneumonia, organism unspecified<br>Unspecified viral infection                                   | Chronic or unspecified duodenal ulcer with hemorrhage, without mention of obstruction<br>Esophageal reflux<br>Low back pain<br>Migraine, unspecified, without mention of intractable migraine without mention of status migrainosus<br>Rash and other nonspecific skin eruption<br>Other and unspecified noninfectious gastroenteritis and colitis<br>Pain in joint, shoulder region<br>Pyelonephritis, unspecified |
| Substance Use-related | Alcohol withdrawal<br>Alcohol abuse, unspecified<br>Acute alcoholic intoxication in alcoholism, unspecified<br>Other and unspecified alcohol dependence, unspecified<br>Acute alcoholic intoxication in alcoholism, continuous<br>Alcohol dependence with withdrawal, unspecified<br>Alcohol abuse, continuous<br>Alcohol withdrawal delirium<br>Drug withdrawal<br>Other, mixed, or unspecified drug abuse, unspecified<br>Alcohol dependence, uncomplicated<br>Alcohol abuse with intoxication, unspecified | Alcohol abuse, uncomplicated<br>Alcohol dependence with intoxication, unspecified<br>Alcoholic gastritis, without mention of hemorrhage<br>Amphetamine and other psychostimulant dependence, unspecified<br>Alcohol dependence with withdrawal, uncomplicated<br>Other and unspecified alcohol dependence, episodic<br>Alcohol abuse with intoxication, uncomplicated<br>Alcohol abuse, episodic                    |

**eFigure 2.** Estimated Percentage of Participants by Group With Health Care System Engagement per Year of Study Follow-up

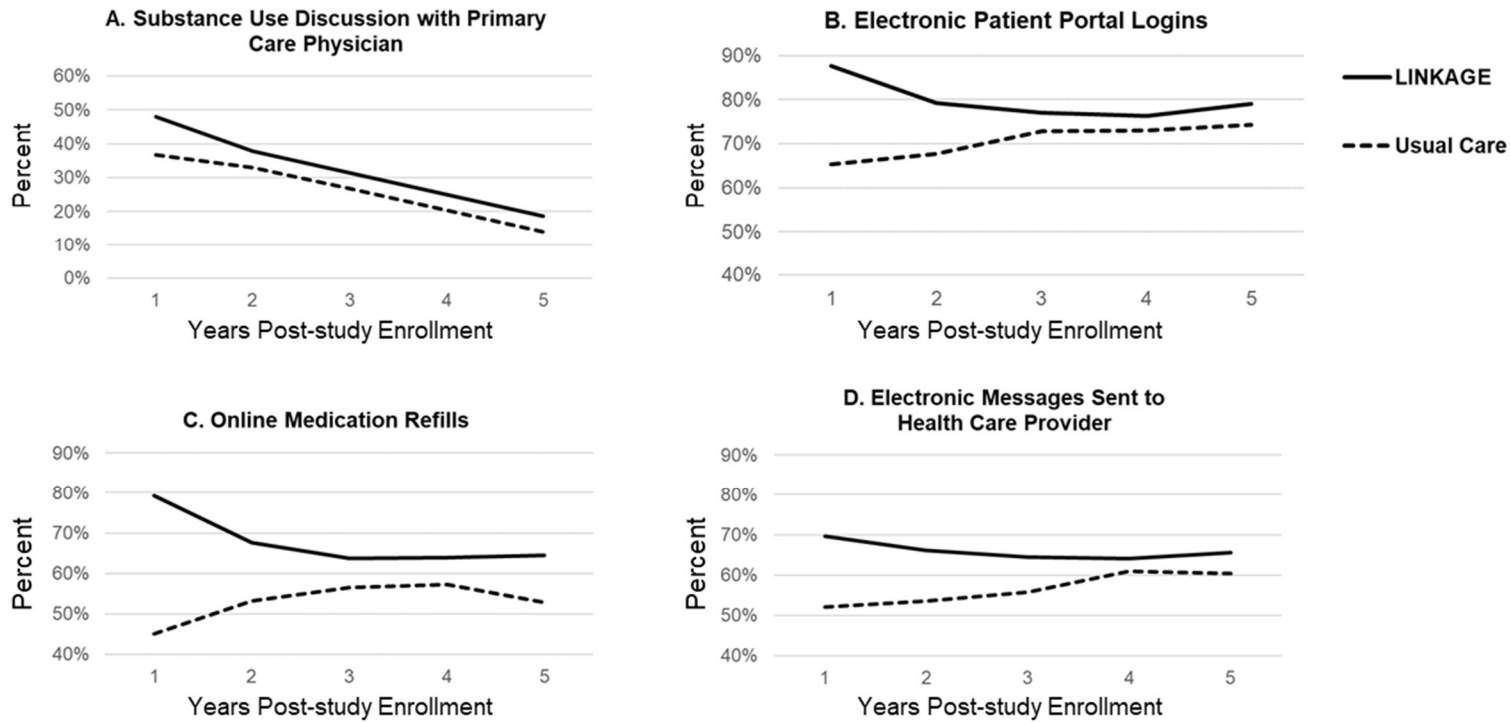

Marginal percent estimates by group were plotted from a modified Poisson generalized estimating equations model per outcome including time as a categorical variable, a time x group interaction term, and age, Charlson comorbidity index, and baseline emergent-type emergency department use.

**eTable 1.** Health System Engagement Associated With Study Group Using Multiply Imputed Data

| Time                         | Group differences <sup>b</sup>                                   |                |  |                                  |                |  |                           |                |                                                         |                |
|------------------------------|------------------------------------------------------------------|----------------|--|----------------------------------|----------------|--|---------------------------|----------------|---------------------------------------------------------|----------------|
|                              | Substance use discussion with primary care provider <sup>a</sup> |                |  | Electronic patient portal logins |                |  | Online medication refills |                | Secure electronic messages sent to health care provider |                |
|                              | RR(95% CI)                                                       | <i>P</i> value |  | RR(95% CI)                       | <i>P</i> value |  | RR(95% CI)                | <i>P</i> value | RR(95% CI)                                              | <i>P</i> value |
| Yr. 1                        | 1.26 (0.99-1.60)                                                 | .06            |  | 1.32 (1.18-1.47)                 | < .001         |  | 1.70 (1.45-1.99)          | < .001         | 1.32 (1.13-1.54)                                        | < .001         |
| Yr. 2                        | 1.09 (0.83-1.44)                                                 | .54            |  | 1.16 (1.02-1.31)                 | .02            |  | 1.23 (1.05-1.46)          | .01            | 1.21 (1.04-1.42)                                        | .02            |
| Yr. 3                        | —                                                                | —              |  | 1.06 (0.94-1.20)                 | .33            |  | 1.11 (0.93-1.32)          | .24            | 1.12 (0.95-1.33)                                        | .19            |
| Yr. 4                        | —                                                                | —              |  | 1.07 (0.95-1.20)                 | .27            |  | 1.08 (0.91-1.27)          | .38            | 1.05 (0.89-1.24)                                        | .55            |
| Yr. 5                        | 1.26 (0.76-2.07)                                                 | .37            |  | 1.05 (0.94-1.17)                 | .39            |  | 1.13 (0.96-1.33)          | .13            | 1.05 (0.90-1.23)                                        | .54            |
| All years (1-5) <sup>c</sup> | 1.20 (0.99-1.45)                                                 | .07            |  | 1.12 (1.03-1.21)                 | .01            |  | 1.23 (1.09-1.38)          | .001           | 1.12 (1.00-1.25)                                        | .06            |

Time: year since study enrollment; RR: risk ratio; CI: confidence interval.

<sup>a</sup> Telephone interviews were conducted at 1, 2, and 5 years after study enrollment.

<sup>b</sup> Group differences were estimated from a modified Poisson regression model per follow-up time point, adjusting for baseline age, Charlson comorbidity index, and emergent-type ED use.

<sup>c</sup> Group differences were estimated from a modified Poisson generalized estimating equations model, adjusting for (linear) time and baseline age, Charlson comorbidity index, and emergent-type ED use.

**eTable 2.** Health System Engagement Associated With Study Group, Complete Cases, No Deaths

| Time                         | Group differences <sup>b</sup>                                   |                |                  |                                  |                  |                           |                  |                                              |  |  |
|------------------------------|------------------------------------------------------------------|----------------|------------------|----------------------------------|------------------|---------------------------|------------------|----------------------------------------------|--|--|
|                              | Substance use discussion with primary care provider <sup>a</sup> |                |                  | Electronic patient portal logins |                  | Online medication refills |                  | Secure messages sent to health care provider |  |  |
|                              | RR(95% CI)                                                       | <i>P</i> value | RR(95% CI)       | <i>P</i> value                   | RR(95% CI)       | <i>P</i> value            | RR(95% CI)       | <i>P</i> value                               |  |  |
| Yr. 1                        | 1.50 (1.08-2.07)                                                 | .02            | 1.35 (1.17-1.56) | < .001                           | 2.05 (1.61-2.61) | < .001                    | 1.47 (1.18-1.84) | .001                                         |  |  |
| Yr. 2                        | 1.24 (0.85-1.79)                                                 | .26            | 1.18 (1.00-1.38) | .048                             | 1.28 (1.04-1.59) | .02                       | 1.36 (1.09-1.69) | .01                                          |  |  |
| Yr. 3                        | —                                                                | —              | 1.07 (0.93-1.23) | .35                              | 1.12 (0.91-1.38) | .28                       | 1.16 (0.94-1.44) | .17                                          |  |  |
| Yr. 4                        | —                                                                | —              | 1.10 (0.95-1.27) | .21                              | 1.20 (0.99-1.45) | .07                       | 1.11 (0.91-1.34) | .30                                          |  |  |
| Yr. 5                        | 1.19 (0.59-2.41)                                                 | .62            | 1.06 (0.93-1.21) | .40                              | 1.18 (0.95-1.46) | .13                       | 1.09 (0.90-1.33) | .36                                          |  |  |
| All years (1-5) <sup>c</sup> | 1.32 (1.02-1.69)                                                 | .03            | 1.16 (1.03-1.30) | .01                              | 1.42 (1.21-1.68) | < .001                    | 1.22 (1.04-1.43) | .02                                          |  |  |

Time: year since study enrollment; RR: risk ratio; CI: confidence interval.

<sup>a</sup> Telephone interviews were conducted at 1, 2, and 5 years after study enrollment.

<sup>b</sup> Group differences were estimated from a modified Poisson regression model per follow-up time point, adjusting for baseline age, Charlson comorbidity index, and emergent-type ED use.

<sup>c</sup> Group differences were estimated from a modified Poisson generalized estimating equations model, adjusting for (linear) time and baseline age, Charlson comorbidity index, and emergent-type ED use.

**eTable 3.** Five-Year Health Care Use by Study Groups, Multiply Imputed Data

| Health care service use | Group differences in annual change over the 5 years since study enrollment <sup>a</sup> |             |                | Time-adjusted group differences across 5 years post-study enrollment <sup>b</sup> |             |                |
|-------------------------|-----------------------------------------------------------------------------------------|-------------|----------------|-----------------------------------------------------------------------------------|-------------|----------------|
|                         | Risk Ratio                                                                              | (95% CI)    | <i>P</i> value | Risk Ratio                                                                        | (95% CI)    | <i>P</i> value |
| Primary care            | 1.03                                                                                    | (1.00-1.07) | .03            | 1.00                                                                              | (0.94-1.06) | .97            |
| Emergency department    | 0.97                                                                                    | (0.90-1.06) | .52            | 0.92                                                                              | (0.76-1.10) | .34            |
| Emergent                | 0.95                                                                                    | (0.78-1.16) | .63            | 1.03                                                                              | (0.70-1.53) | .87            |
| Non-emergent            | 1.00                                                                                    | (0.84-1.18) | .97            | 0.77                                                                              | (0.58-1.01) | .06            |
| Substance-related       | 0.86                                                                                    | (0.70-1.06) | .16            | 0.84                                                                              | (0.51-0.99) | .48            |

CI: confidence interval.

<sup>a</sup> Group × linear time effect; modified Poisson generalized estimating equations models included (linear) time, a time × group interaction term, and baseline age, Charlson comorbidity index, and emergent-type emergency department use.

<sup>b</sup> Time-adjusted group effect; GEE models included (linear) time, no interaction term, and baseline age, Charlson comorbidity index, and emergent-type emergency department use.

**eTable 4.** Five-Year Health Care Use by Study Group, Complete Cases, No Deaths

|                         | Group differences in annual change over the 5 years since study enrollment <sup>a</sup> |             |                | Time-adjusted group differences across 5 years post-study enrollment <sup>b</sup> |             |                |
|-------------------------|-----------------------------------------------------------------------------------------|-------------|----------------|-----------------------------------------------------------------------------------|-------------|----------------|
|                         | Risk Ratio                                                                              | (95% CI)    | <i>P</i> value | Risk Ratio                                                                        | (95% CI)    | <i>P</i> value |
| Health care service use |                                                                                         |             |                |                                                                                   |             |                |
| Primary care            | 1.05                                                                                    | (1.01-1.09) | .01            | 0.98                                                                              | (0.91-1.05) | .60            |
| Emergency department    | 0.98                                                                                    | (0.87-1.10) | .69            | 0.89                                                                              | (0.68-1.16) | .37            |
| Emergent                | 0.81                                                                                    | (0.62-1.06) | .12            | 1.34                                                                              | (0.79-2.28) | .28            |
| Non-emergent            | 1.12                                                                                    | (0.89-1.39) | .34            | 0.60                                                                              | (0.39-0.93) | .02            |
| Substance-related       | 0.71                                                                                    | (0.56-0.92) | .01            | 0.73                                                                              | (0.35-1.52) | .40            |

CI: confidence interval.

<sup>a</sup> Group × linear time effect; modified Poisson generalized estimating equations models included (linear) time, a time × group interaction term, and baseline age, Charlson comorbidity index, and emergent-type emergency department use.

<sup>b</sup> Time-adjusted group effect; modified Poisson generalized estimating equations models included (linear) time, no interaction term, and baseline age, Charlson comorbidity index, and emergent-type emergency department use.
