# Supplementary material for: Patterns of Health Care Use 5 Years After an Intervention Linking Patients in Addiction Treatment With a Primary Care Practitioner
Source: PubMed Central journal article supplement (PMC9650610; doi:10.1001/jamanetworkopen.2022.41338), 2022-11-10
Supplement: jamanetwopen-e2241338-s003.pdf [file jamanetwopen-e2241338-s003.pdf]

## Data Sharing Statement

Iturralde. Patterns of Health Care Use 5 Years After an Intervention Linking Patients in Addiction Treatment With a Primary Care Practitioner. *JAMA Netw Open*. Published November 10, 2022. doi:10.1001/jamanetworkopen.2022.41338

### Data

**Data available:** No
